# Supplementary material
Source: PubMed Central journal article supplement (PMC3253886)
Supplement: NIHMS330453-supplement-01.pdf [file NIHMS330453-supplement-01.pdf]

| <b>Symbol</b> | <b>Entrez Gene Name</b>                                                                  |
|---------------|------------------------------------------------------------------------------------------|
| ACACA         | acetyl-CoA carboxylase alpha                                                             |
| ACADVL        | acyl-CoA dehydrogenase, very long chain                                                  |
| ACOT11        | acyl-CoA thioesterase 11                                                                 |
| ACOX1         | acyl-CoA oxidase 1, palmitoyl                                                            |
| ACP5          | acid phosphatase 5, tartrate resistant                                                   |
| ACTA1         | actin, alpha 1, skeletal muscle                                                          |
| ACTC1         | actin, alpha, cardiac muscle 1                                                           |
| ACTG1         | actin, gamma 1                                                                           |
| ACTN1         | actinin, alpha 1                                                                         |
| ACTN4         | actinin, alpha 4                                                                         |
| AHCY          | adenosylhomocysteinase                                                                   |
| AK2           | adenylate kinase 2                                                                       |
| AKR1A1        | aldo-keto reductase family 1, member A1 (aldehyde reductase)                             |
| ALDH2         | aldehyde dehydrogenase 2 family (mitochondrial)                                          |
| ALDOA         | aldolase A, fructose-bisphosphate                                                        |
| ALDOC         | aldolase C, fructose-bisphosphate                                                        |
| AP1B1         | adaptor-related protein complex 1, beta 1 subunit                                        |
| APOBEC3B      | apolipoprotein B mRNA editing enzyme, catalytic polypeptide-like 3B                      |
| APRT          | adenine phosphoribosyltransferase                                                        |
| ARF1          | ADP-ribosylation factor 1                                                                |
| ARF4          | ADP-ribosylation factor 4                                                                |
| ARHGAP1       | Rho GTPase activating protein 1                                                          |
| ARHGDI1       | Rho GDP dissociation inhibitor (GDI) alpha                                               |
| ARHGDI2       | Rho GDP dissociation inhibitor (GDI) beta                                                |
| ARL6IP5       | ADP-ribosylation-like factor 6 interacting protein 5                                     |
| ARPC2         | actin related protein 2/3 complex, subunit 2, 34kDa                                      |
| ARPC3         | actin related protein 2/3 complex, subunit 3, 21kDa                                      |
| ARPC5         | actin related protein 2/3 complex, subunit 5, 16kDa                                      |
| ATP5A1        | ATP synthase, H+ transporting, mitochondrial F1 complex, alpha subunit 1, cardiac muscle |
| ATP5B         | ATP synthase, H+ transporting, mitochondrial F1 complex, beta polypeptide                |
| ATP5C1        | ATP synthase, H+ transporting, mitochondrial F1 complex, gamma polypeptide 1             |
| ATP5D         | ATP synthase, H+ transporting, mitochondrial F1 complex, delta subunit                   |
| ATP5F1        | ATP synthase, H+ transporting, mitochondrial Fo complex, subunit B1                      |
| ATP5H         | ATP synthase, H+ transporting, mitochondrial Fo complex, subunit d                       |
| ATP5L         | ATP synthase, H+ transporting, mitochondrial Fo complex, subunit G                       |
| ATP5O         | ATP synthase, H+ transporting, mitochondrial F1 complex, O subunit                       |

|          |                                                                                   |
|----------|-----------------------------------------------------------------------------------|
| ATP6V0A4 | ATPase, H <sup>+</sup> transporting, lysosomal V0 subunit a4                      |
| ATP6V1A  | ATPase, H <sup>+</sup> transporting, lysosomal 70kDa, V1 subunit A                |
| ATP6V1B1 | ATPase, H <sup>+</sup> transporting, lysosomal 56/58kDa, V1 subunit B1            |
| ATP6V1B2 | ATPase, H <sup>+</sup> transporting, lysosomal 56/58kDa, V1 subunit B2            |
| ATP6V1E1 | ATPase, H <sup>+</sup> transporting, lysosomal 31kDa, V1 subunit E1               |
| BID      | BH3 interacting domain death agonist                                              |
| BLVRA    | biliverdin reductase A                                                            |
| BTBD2    | BTB (POZ) domain containing 2                                                     |
| BZW1     | basic leucine zipper and W2 domains 1                                             |
| C1QBP    | complement component 1, q subcomponent binding protein                            |
| CALR     | calreticulin                                                                      |
| CAND1    | cullin-associated and neddylation-dissociated 1                                   |
| CANX     | calnexin                                                                          |
| CAPN1    | calpain 1, (mu/I) large subunit                                                   |
| CAPN2    | calpain 2, (m/II) large subunit                                                   |
| CAPNS1   | calpain, small subunit 1                                                          |
| CAPZA1   | capping protein (actin filament) muscle Z-line, alpha 1                           |
| CAPZA2   | capping protein (actin filament) muscle Z-line, alpha 2                           |
| CAPZB    | capping protein (actin filament) muscle Z-line, beta                              |
| CASP1    | caspase 1, apoptosis-related cysteine peptidase (interleukin 1, beta, convertase) |
| CAT      | catalase                                                                          |
| CCT2     | chaperonin containing TCP1, subunit 2 (beta)                                      |
| CCT3     | chaperonin containing TCP1, subunit 3 (gamma)                                     |
| CCT4     | chaperonin containing TCP1, subunit 4 (delta)                                     |
| CCT5     | chaperonin containing TCP1, subunit 5 (epsilon)                                   |
| CCT6A    | chaperonin containing TCP1, subunit 6A (zeta 1)                                   |
| CCT7     | chaperonin containing TCP1, subunit 7 (eta)                                       |
| CCT8     | chaperonin containing TCP1, subunit 8 (theta)                                     |
| CDC42    | cell division cycle 42 (GTP binding protein, 25kDa)                               |
| CDC42BPA | CDC42 binding protein kinase alpha (DMPK-like)                                    |
| CES1     | carboxylesterase 1                                                                |
| CKB      | creatine kinase, brain                                                            |
| CLC      | Charcot-Leyden crystal protein                                                    |
| CMPK2    | cytidine monophosphate (UMP-CMP) kinase 2, mitochondrial                          |
| CNDP2    | CNDP dipeptidase 2 (metallopeptidase M20 family)                                  |
| CNN2     | calponin 2                                                                        |
| COMT     | catechol-O-methyltransferase                                                      |

|         |                                                                                        |
|---------|----------------------------------------------------------------------------------------|
| COPA    | coatamer protein complex, subunit alpha                                                |
| COPG    | coatamer protein complex, subunit gamma                                                |
| CORO1A  | coronin, actin binding protein, 1A                                                     |
| CORO1C  | coronin, actin binding protein, 1C                                                     |
| COTL1   | coactosin-like 1 (Dictyostelium)                                                       |
| COX4I1  | cytochrome c oxidase subunit IV isoform 1                                              |
| COX5A   | cytochrome c oxidase subunit Va                                                        |
| COX5B   | cytochrome c oxidase subunit Vb                                                        |
| COX6B1  | cytochrome c oxidase subunit VIb polypeptide 1 (ubiquitous)                            |
| COX7A2  | cytochrome c oxidase subunit VIIa polypeptide 2 (liver)                                |
| CS      | citrate synthase                                                                       |
| CSTA    | cystatin A (stefin A)                                                                  |
| CSTB    | cystatin B (stefin B)                                                                  |
| CTSD    | cathepsin D                                                                            |
| CTSS    | cathepsin S                                                                            |
| CYB5B   | cytochrome b5 type B (outer mitochondrial membrane)                                    |
| CYBB    | cytochrome b-245, beta polypeptide                                                     |
| CYCS    | cytochrome c, somatic                                                                  |
| DBI     | diazepam binding inhibitor (GABA receptor modulator, acyl-CoA binding protein)         |
| DBNL    | drebrin-like                                                                           |
| DCTPP1  | dCTP pyrophosphatase 1                                                                 |
| DCXR    | dicarbonyl/L-xylulose reductase                                                        |
| DDOST   | dolichyl-diphosphooligosaccharide--protein glycosyltransferase                         |
| DECR1   | 2,4-dienoyl CoA reductase 1, mitochondrial                                             |
| DPYSL2  | dihydropyrimidinase-like 2                                                             |
| DYNC1H1 | dynein, cytoplasmic 1, heavy chain 1                                                   |
| ECH1    | enoyl CoA hydratase 1, peroxisomal                                                     |
| ECHS1   | enoyl CoA hydratase, short chain, 1, mitochondrial                                     |
| EEF1A1  | eukaryotic translation elongation factor 1 alpha 1                                     |
| EEF1B2  | eukaryotic translation elongation factor 1 beta 2                                      |
| EEF1D   | eukaryotic translation elongation factor 1 delta (guanine nucleotide exchange protein) |
| EEF2    | eukaryotic translation elongation factor 2                                             |
| EIF1    | eukaryotic translation initiation factor 1                                             |
| EIF2AK2 | eukaryotic translation initiation factor 2-alpha kinase 2                              |
| EIF3A   | eukaryotic translation initiation factor 3, subunit A                                  |
| EIF3B   | eukaryotic translation initiation factor 3, subunit B                                  |
| EIF3F   | eukaryotic translation initiation factor 3, subunit F                                  |

|         |                                                                            |
|---------|----------------------------------------------------------------------------|
| EIF4A1  | eukaryotic translation initiation factor 4A1                               |
| EIF4G1  | eukaryotic translation initiation factor 4 gamma, 1                        |
| EIF4H   | eukaryotic translation initiation factor 4H                                |
| EIF5A   | eukaryotic translation initiation factor 5A                                |
| ELAVL1  | ELAV (embryonic lethal, abnormal vision, Drosophila)-like 1 (Hu antigen R) |
| EML2    | echinoderm microtubule associated protein like 2                           |
| ENO1    | enolase 1, (alpha)                                                         |
| ERO1L   | ERO1-like (S. cerevisiae)                                                  |
| ERP29   | endoplasmic reticulum protein 29                                           |
| ETFA    | electron-transfer-flavoprotein, alpha polypeptide                          |
| EVL     | Enah/Vasp-like                                                             |
| FABP5   | fatty acid binding protein 5 (psoriasis-associated)                        |
| FAM129A | family with sequence similarity 129, member A                              |
| FAM136A | family with sequence similarity 136, member A                              |
| FASN    | fatty acid synthase                                                        |
| FBP1    | fructose-1,6-bisphosphatase 1                                              |
| FERMT3  | fermitin family member 3                                                   |
| FH      | fumarate hydratase                                                         |
| FKBP1A  | FK506 binding protein 1A, 12kDa                                            |
| FLNA    | filamin A, alpha                                                           |
| FMNL1   | formin-like 1                                                              |
| FSCN1   | fascin homolog 1, actin-bundling protein (Strongylocentrotus purpuratus)   |
| FTH1    | ferritin, heavy polypeptide 1                                              |
| FTL     | ferritin, light polypeptide                                                |
| G6PD    | glucose-6-phosphate dehydrogenase                                          |
| GANAB   | glucosidase, alpha; neutral AB                                             |
| GAPDH   | glyceraldehyde-3-phosphate dehydrogenase                                   |
| GBE1    | glucan (1,4-alpha-), branching enzyme 1                                    |
| GBP1    | guanylate binding protein 1, interferon-inducible, 67kDa                   |
| GDI2    | GDP dissociation inhibitor 2                                               |
| GLIPR2  | GLI pathogenesis-related 2                                                 |
| GLO1    | glyoxalase I                                                               |
| GLRX    | glutaredoxin (thioltransferase)                                            |
| GLUD2   | glutamate dehydrogenase 2                                                  |
| GMFG    | glia maturation factor, gamma                                              |
| GNB2L1  | guanine nucleotide binding protein (G protein), beta polypeptide 2-like 1  |
| GPX1    | glutathione peroxidase 1                                                   |

|          |                                                                                                                  |
|----------|------------------------------------------------------------------------------------------------------------------|
| GRB2     | growth factor receptor-bound protein 2                                                                           |
| GSTK1    | glutathione S-transferase kappa 1                                                                                |
| GSTO1    | glutathione S-transferase omega 1                                                                                |
| GSTP1    | glutathione S-transferase pi 1                                                                                   |
| HADH     | hydroxyacyl-CoA dehydrogenase                                                                                    |
| HADHA    | hydroxyacyl-CoA dehydrogenase/3-ketoacyl-CoA thiolase/enoyl-CoA hydratase (trifunctional protein), alpha subunit |
| HADHB    | hydroxyacyl-CoA dehydrogenase/3-ketoacyl-CoA thiolase/enoyl-CoA hydratase (trifunctional protein), beta subunit  |
| HBB      | hemoglobin, beta                                                                                                 |
| HBD      | hemoglobin, delta                                                                                                |
| HPRT1    | hypoxanthine phosphoribosyltransferase 1                                                                         |
| HSD17B10 | hydroxysteroid (17-beta) dehydrogenase 10                                                                        |
| HSP90AA1 | heat shock protein 90kDa alpha (cytosolic), class A member 1                                                     |
| HSP90AB1 | heat shock protein 90kDa alpha (cytosolic), class B member 1                                                     |
| HSP90B1  | heat shock protein 90kDa beta (Grp94), member 1                                                                  |
| HSPA4    | heat shock 70kDa protein 4                                                                                       |
| HSPA5    | heat shock 70kDa protein 5 (glucose-regulated protein, 78kDa)                                                    |
| HSPA8    | heat shock 70kDa protein 8                                                                                       |
| HSPA9    | heat shock 70kDa protein 9 (mortalin)                                                                            |
| HSPD1    | heat shock 60kDa protein 1 (chaperonin)                                                                          |
| HSPE1    | heat shock 10kDa protein 1 (chaperonin 10)                                                                       |
| HYOU1    | hypoxia up-regulated 1                                                                                           |
| IDH1     | isocitrate dehydrogenase 1 (NADP+), soluble                                                                      |
| IDH2     | isocitrate dehydrogenase 2 (NADP+), mitochondrial                                                                |
| IDH3B    | isocitrate dehydrogenase 3 (NAD+) beta                                                                           |
| IDO1     | indoleamine 2,3-dioxygenase 1                                                                                    |
| IFI30    | interferon, gamma-inducible protein 30                                                                           |
| IFIT1    | interferon-induced protein with tetratricopeptide repeats 1                                                      |
| IFIT3    | interferon-induced protein with tetratricopeptide repeats 3                                                      |
| IMPDH2   | IMP (inosine 5'-monophosphate) dehydrogenase 2                                                                   |
| IQGAP1   | IQ motif containing GTPase activating protein 1                                                                  |
| KARS     | lysyl-tRNA synthetase                                                                                            |
| KRT1     | keratin 1                                                                                                        |
| KRT10    | keratin 10                                                                                                       |
| KRT14    | keratin 14                                                                                                       |
| KRT2     | keratin 2                                                                                                        |
| KRT5     | keratin 5                                                                                                        |
| KRT9     | keratin 9                                                                                                        |

|              |                                                                                   |
|--------------|-----------------------------------------------------------------------------------|
| KYNU         | kynureninase                                                                      |
| LACTB        | lactamase, beta                                                                   |
| LAP3         | leucine aminopeptidase 3                                                          |
| LASP1        | LIM and SH3 protein 1                                                             |
| LCP1         | lymphocyte cytosolic protein 1 (L-plastin)                                        |
| LDHA         | lactate dehydrogenase A                                                           |
| LDHB         | lactate dehydrogenase B                                                           |
| LGALS9B      | lectin, galactoside-binding, soluble, 9B                                          |
| LOC100290142 | up-regulated during skeletal muscle growth 5 homolog (mouse)                      |
| LTA4H        | leukotriene A4 hydrolase                                                          |
| LYN          | v-src-1 Yamaguchi sarcoma viral related oncogene homolog                          |
| MAPRE1       | microtubule-associated protein, RP/EB family, member 1                            |
| MARCKSL1     | MARCKS-like 1                                                                     |
| MDH1         | malate dehydrogenase 1, NAD (soluble)                                             |
| MDH2         | malate dehydrogenase 2, NAD (mitochondrial)                                       |
| MPEG1        | macrophage expressed 1                                                            |
| MPO          | myeloperoxidase                                                                   |
| MRPL12       | mitochondrial ribosomal protein L12                                               |
| MT-CO2       | cytochrome c oxidase subunit II                                                   |
| MT-COI       | cytochrome c oxidase subunit I                                                    |
| MTMR1        | myotubularin related protein 1                                                    |
| MYH9         | myosin, heavy chain 9, non-muscle                                                 |
| MYL6         | myosin, light chain 6, alkali, smooth muscle and non-muscle                       |
| MYO1F        | myosin IF                                                                         |
| MYO1G        | myosin IG                                                                         |
| NAGK         | N-acetylglucosamine kinase                                                        |
| NAPA         | N-ethylmaleimide-sensitive factor attachment protein, alpha                       |
| NCF2         | neutrophil cytosolic factor 2                                                     |
| NDUFA10      | NADH dehydrogenase (ubiquinone) 1 alpha subcomplex, 10, 42kDa                     |
| NDUFS3       | NADH dehydrogenase (ubiquinone) Fe-S protein 3, 30kDa (NADH-coenzyme Q reductase) |
| NIPSNAP3A    | nipsnap homolog 3A (C. elegans)                                                   |
| NNT          | nicotinamide nucleotide transhydrogenase                                          |
| OAS2         | 2'-5'-oligoadenylate synthetase 2, 69/71kDa                                       |
| OGDH         | oxoglutarate (alpha-ketoglutarate) dehydrogenase (lipoamide)                      |
| OLA1         | Obg-like ATPase 1                                                                 |
| OPHN1        | oligophrenin 1                                                                    |
| P4HB         | prolyl 4-hydroxylase, beta polypeptide                                            |

|         |                                                         |
|---------|---------------------------------------------------------|
| PABPC1  | poly(A) binding protein, cytoplasmic 1                  |
| PDIA3   | protein disulfide isomerase family A, member 3          |
| PDIA4   | protein disulfide isomerase family A, member 4          |
| PDIA6   | protein disulfide isomerase family A, member 6          |
| PDLIM1  | PDZ and LIM domain 1                                    |
| PEA15   | phosphoprotein enriched in astrocytes 15                |
| PEBP1   | phosphatidylethanolamine binding protein 1              |
| PFKL    | phosphofructokinase, liver                              |
| PFN1    | profilin 1                                              |
| PGD     | phosphogluconate dehydrogenase                          |
| PGK1    | phosphoglycerate kinase 1                               |
| PGLS    | 6-phosphogluconolactonase                               |
| PGM2    | phosphoglucomutase 2                                    |
| PHB2    | prohibitin 2                                            |
| PKM2    | pyruvate kinase, muscle                                 |
| PLEC    | plectin                                                 |
| PLEK    | pleckstrin                                              |
| PLIN3   | perilipin 3                                             |
| PPA1    | pyrophosphatase (inorganic) 1                           |
| PPA2    | pyrophosphatase (inorganic) 2                           |
| PPIA    | peptidylprolyl isomerase A (cyclophilin A)              |
| PPIB    | peptidylprolyl isomerase B (cyclophilin B)              |
| PPP1CA  | protein phosphatase 1, catalytic subunit, alpha isozyme |
| PPP2R1A | protein phosphatase 2, regulatory subunit A, alpha      |
| PRDX1   | peroxiredoxin 1                                         |
| PRDX3   | peroxiredoxin 3                                         |
| PRDX5   | peroxiredoxin 5                                         |
| PRDX6   | peroxiredoxin 6                                         |
| PRKACA  | protein kinase, cAMP-dependent, catalytic, alpha        |
| PRKCSH  | protein kinase C substrate 80K-H                        |
| PSMA1   | proteasome (prosome, macropain) subunit, alpha type, 1  |
| PSMA2   | proteasome (prosome, macropain) subunit, alpha type, 2  |
| PSMA5   | proteasome (prosome, macropain) subunit, alpha type, 5  |
| PSMA8   | proteasome (prosome, macropain) subunit, alpha type, 8  |
| PSMB10  | proteasome (prosome, macropain) subunit, beta type, 10  |
| PSMB2   | proteasome (prosome, macropain) subunit, beta type, 2   |
| PSMB3   | proteasome (prosome, macropain) subunit, beta type, 3   |

|        |                                                                                           |
|--------|-------------------------------------------------------------------------------------------|
| PSMB4  | proteasome (prosome, macropain) subunit, beta type, 4                                     |
| PSMB9  | proteasome (prosome, macropain) subunit, beta type, 9 (large multifunctional peptidase 2) |
| PSMD14 | proteasome (prosome, macropain) 26S subunit, non-ATPase, 14                               |
| PSMD2  | proteasome (prosome, macropain) 26S subunit, non-ATPase, 2                                |
| PSME1  | proteasome (prosome, macropain) activator subunit 1 (PA28 alpha)                          |
| PSME2  | proteasome (prosome, macropain) activator subunit 2 (PA28 beta)                           |
| PTGES3 | prostaglandin E synthase 3 (cytosolic)                                                    |
| PTK6   | PTK6 protein tyrosine kinase 6                                                            |
| PTPN6  | protein tyrosine phosphatase, non-receptor type 6                                         |
| PYCARD | PYD and CARD domain containing                                                            |
| RAB10  | RAB10, member RAS oncogene family                                                         |
| RAB11A | RAB11A, member RAS oncogene family                                                        |
| RAB1A  | RAB1A, member RAS oncogene family                                                         |
| RAB5B  | RAB5B, member RAS oncogene family                                                         |
| RAB5C  | RAB5C, member RAS oncogene family                                                         |
| RAB7A  | RAB7A, member RAS oncogene family                                                         |
| RAB8A  | RAB8A, member RAS oncogene family                                                         |
| RAB8B  | RAB8B, member RAS oncogene family                                                         |
| RAC2   | ras-related C3 botulinum toxin substrate 2 (rho family, small GTP binding protein Rac2)   |
| RAP1A  | RAP1A, member of RAS oncogene family                                                      |
| RAP1B  | RAP1B, member of RAS oncogene family                                                      |
| RCN1   | reticulocalbin 1, EF-hand calcium binding domain                                          |
| RHOA   | ras homolog gene family, member A                                                         |
| RHOG   | ras homolog gene family, member G (rho G)                                                 |
| RNH1   | ribonuclease/angiogenin inhibitor 1                                                       |
| RNPEP  | arginyl aminopeptidase (aminopeptidase B)                                                 |
| RPL10  | ribosomal protein L10                                                                     |
| RPL10A | ribosomal protein L10a                                                                    |
| RPL11  | ribosomal protein L11                                                                     |
| RPL12  | ribosomal protein L12                                                                     |
| RPL13  | ribosomal protein L13                                                                     |
| RPL13A | ribosomal protein L13a                                                                    |
| RPL14  | ribosomal protein L14                                                                     |
| RPL15  | ribosomal protein L15                                                                     |
| RPL17  | ribosomal protein L17                                                                     |
| RPL18  | ribosomal protein L18                                                                     |
| RPL18A | ribosomal protein L18a                                                                    |



|       |                                |
|-------|--------------------------------|
| RPL19 | ribosomal protein L19          |
| RPL23 | ribosomal protein L23          |
| RPL24 | ribosomal protein L24          |
| RPL27 | ribosomal protein L27          |
| RPL28 | ribosomal protein L28          |
| RPL30 | ribosomal protein L30          |
| RPL31 | ribosomal protein L31          |
| RPL32 | ribosomal protein L32          |
| RPL35 | ribosomal protein L35          |
| RPL4  | ribosomal protein L4           |
| RPL5  | ribosomal protein L5           |
| RPL6  | ribosomal protein L6           |
| RPL7A | ribosomal protein L7a          |
| RPL8  | ribosomal protein L8           |
| RPL9  | ribosomal protein L9           |
| RPLP0 | ribosomal protein, large, P0   |
| RPLP1 | ribosomal protein, large, P1   |
| RPLP2 | ribosomal protein, large, P2   |
| RPN1  | ribophorin I                   |
| RPN2  | ribophorin II                  |
| RPS10 | ribosomal protein S10          |
| RPS11 | ribosomal protein S11          |
| RPS12 | ribosomal protein S12          |
| RPS13 | ribosomal protein S13          |
| RPS14 | ribosomal protein S14          |
| RPS16 | ribosomal protein S16          |
| RPS17 | ribosomal protein S17          |
| RPS19 | ribosomal protein S19          |
| RPS20 | ribosomal protein S20          |
| RPS21 | ribosomal protein S21          |
| RPS24 | ribosomal protein S24          |
| RPS25 | ribosomal protein S25          |
| RPS26 | ribosomal protein S26          |
| RPS27 | ribosomal protein S27          |
| RPS3  | ribosomal protein S3           |
| RPS4X | ribosomal protein S4, X-linked |
| RPS5  | ribosomal protein S5           |

|          |                                                                                             |
|----------|---------------------------------------------------------------------------------------------|
| RPS6     | ribosomal protein S6                                                                        |
| RPS7     | ribosomal protein S7                                                                        |
| RPS8     | ribosomal protein S8                                                                        |
| RPS9     | ribosomal protein S9                                                                        |
| RSAD2    | radical S-adenosyl methionine domain containing 2                                           |
| RTN4     | reticulon 4                                                                                 |
| S100A10  | S100 calcium binding protein A10                                                            |
| S100A11  | S100 calcium binding protein A11                                                            |
| S100A4   | S100 calcium binding protein A4                                                             |
| S100A6   | S100 calcium binding protein A6                                                             |
| S100A8   | S100 calcium binding protein A8                                                             |
| S100A9   | S100 calcium binding protein A9                                                             |
| SAR1B    | SAR1 homolog B ( <i>S. cerevisiae</i> )                                                     |
| SCP2     | sterol carrier protein 2                                                                    |
| SDHA     | succinate dehydrogenase complex, subunit A, flavoprotein (Fp)                               |
| SEPT2    | septin 2                                                                                    |
| SEPT7    | septin 7                                                                                    |
| SERPINB1 | serpin peptidase inhibitor, clade B (ovalbumin), member 1                                   |
| SERPINB9 | serpin peptidase inhibitor, clade B (ovalbumin), member 9                                   |
| SH3BGR1  | SH3 domain binding glutamic acid-rich protein like                                          |
| SHMT2    | serine hydroxymethyltransferase 2 (mitochondrial)                                           |
| SLC25A24 | solute carrier family 25 (mitochondrial carrier; phosphate carrier), member 24              |
| SLC25A3  | solute carrier family 25 (mitochondrial carrier; phosphate carrier), member 3               |
| SLC25A5  | solute carrier family 25 (mitochondrial carrier; adenine nucleotide translocator), member 5 |
| SOD1     | superoxide dismutase 1, soluble                                                             |
| SOD2     | superoxide dismutase 2, mitochondrial                                                       |
| SPTBN2   | spectrin, beta, non-erythrocytic 2                                                          |
| SQRDL    | sulfide quinone reductase-like (yeast)                                                      |
| SQSTM1   | sequestosome 1                                                                              |
| SRCAP    | Snf2-related CREBBP activator protein                                                       |
| SRP14    | signal recognition particle 14kDa (homologous Alu RNA binding protein)                      |
| SRP9     | signal recognition particle 9kDa                                                            |
| SSR1     | signal sequence receptor, alpha                                                             |
| SSR4     | signal sequence receptor, delta (translocon-associated protein delta)                       |
| STIP1    | stress-induced-phosphoprotein 1                                                             |
| STMN1    | stathmin 1                                                                                  |
| TAGLN2   | transgelin 2                                                                                |

|             |                                                             |
|-------------|-------------------------------------------------------------|
| TALDO1      | transaldolase 1                                             |
| TAP2        | transporter 2, ATP-binding cassette, sub-family B (MDR/TAP) |
| TAPBP       | TAP binding protein (tapasin)                               |
| TCP1        | t-complex 1                                                 |
| TKT         | transketolase                                               |
| TMED10      | transmembrane emp24-like trafficking protein 10 (yeast)     |
| TMEM109     | transmembrane protein 109                                   |
| TMEM189-UBE | TMEM189-UBE2V1 readthrough                                  |
| TMOD2       | tropomodulin 2 (neuronal)                                   |
| TMX1        | thioredoxin-related transmembrane protein 1                 |
| TNFAIP8     | tumor necrosis factor, alpha-induced protein 8              |
| TOM1        | target of myb1 (chicken)                                    |
| TPD52L2     | tumor protein D52-like 2                                    |
| TPM3        | tropomyosin 3                                               |
| TPM4        | tropomyosin 4                                               |
| TPP1        | tripeptidyl peptidase I                                     |
| TRAF1       | TNF receptor-associated factor 1                            |
| TRIM25      | tripartite motif-containing 25                              |
| TRIM4       | tripartite motif-containing 4                               |
| TRIM55      | tripartite motif-containing 55                              |
| TSPO        | translocator protein (18kDa)                                |
| TUBA1A      | tubulin, alpha 1a                                           |
| TUBA1B      | tubulin, alpha 1b                                           |
| TUBA4A      | tubulin, alpha 4a                                           |
| TUBB        | tubulin, beta                                               |
| TUBB2C      | tubulin, beta 2C                                            |
| TUFM        | Tu translation elongation factor, mitochondrial             |
| TXN         | thioredoxin                                                 |
| TXNDC5      | thioredoxin domain containing 5 (endoplasmic reticulum)     |
| TXNRD1      | thioredoxin reductase 1                                     |
| UBA1        | ubiquitin-like modifier activating enzyme 1                 |
| UBC         | ubiquitin C                                                 |
| UBE2L3      | ubiquitin-conjugating enzyme E2L 3                          |
| UBE2N       | ubiquitin-conjugating enzyme E2N (UBC13 homolog, yeast)     |
| UGGT1       | UDP-glucose glycoprotein glucosyltransferase 1              |
| UQCRC1      | ubiquinol-cytochrome c reductase core protein I             |
| UQCRC2      | ubiquinol-cytochrome c reductase core protein II            |

|          |                                                                                             |
|----------|---------------------------------------------------------------------------------------------|
| VCP      | valosin-containing protein                                                                  |
| VDAC1    | voltage-dependent anion channel 1                                                           |
| VDAC2    | voltage-dependent anion channel 2                                                           |
| VDAC3    | voltage-dependent anion channel 3                                                           |
| VIM      | vimentin                                                                                    |
| VPS4A    | vacuolar protein sorting 4 homolog A ( <i>S. cerevisiae</i> )                               |
| WARS     | tryptophanyl-tRNA synthetase                                                                |
| WNK3     | WNK lysine deficient protein kinase 3                                                       |
| YWHAB    | tyrosine 3-monooxygenase/tryptophan 5-monooxygenase activation protein, beta polypeptide    |
| YWHAE    | tyrosine 3-monooxygenase/tryptophan 5-monooxygenase activation protein, epsilon polypeptide |
| YWHAG    | tyrosine 3-monooxygenase/tryptophan 5-monooxygenase activation protein, gamma polypeptide   |
| YWHAH    | tyrosine 3-monooxygenase/tryptophan 5-monooxygenase activation protein, eta polypeptide     |
| YWHAQ    | tyrosine 3-monooxygenase/tryptophan 5-monooxygenase activation protein, theta polypeptide   |
| YWHAZ    | tyrosine 3-monooxygenase/tryptophan 5-monooxygenase activation protein, zeta polypeptide    |
| A1BG     | alpha-1-B glycoprotein                                                                      |
| A2M      | alpha-2-macroglobulin                                                                       |
| AHSG     | alpha-2-HS-glycoprotein                                                                     |
| ALB      | albumin                                                                                     |
| AMBP     | alpha-1-microglobulin/bikunin precursor                                                     |
| APOA1    | apolipoprotein A-I                                                                          |
| APOA2    | apolipoprotein A-II                                                                         |
| APOA4    | apolipoprotein A-IV                                                                         |
| APOB     | apolipoprotein B (including Ag(x) antigen)                                                  |
| APOC1    | apolipoprotein C-I                                                                          |
| APOC2    | apolipoprotein C-II                                                                         |
| APOC3    | apolipoprotein C-III                                                                        |
| APOD     | apolipoprotein D                                                                            |
| APOE     | apolipoprotein E                                                                            |
| APOF     | apolipoprotein F                                                                            |
| APOH     | apolipoprotein H (beta-2-glycoprotein I)                                                    |
| APOL1    | apolipoprotein L, 1                                                                         |
| BBS9     | Bardet-Biedl syndrome 9                                                                     |
| C19orf10 | chromosome 19 open reading frame 10                                                         |
| C3       | complement component 3                                                                      |
| C4A/C4B  | complement component 4B (Chido blood group)                                                 |
| C4BPA    | complement component 4 binding protein, alpha                                               |
| C4BPB    | complement component 4 binding protein, beta                                                |

|                |                                                                                     |
|----------------|-------------------------------------------------------------------------------------|
| CCL19          | chemokine (C-C motif) ligand 19                                                     |
| CFB            | complement factor B                                                                 |
| CFH            | complement factor H                                                                 |
| CLU            | clusterin                                                                           |
| DCD            | dermcidin                                                                           |
| DEFA1 (include | defensin, alpha 1                                                                   |
| ELANE          | elastase, neutrophil expressed                                                      |
| ERAP1          | endoplasmic reticulum aminopeptidase 1                                              |
| F2             | coagulation factor II (thrombin)                                                    |
| GC             | group-specific component (vitamin D binding protein)                                |
| GPI            | glucose-6-phosphate isomerase                                                       |
| GSN            | gelsolin                                                                            |
| HP             | haptoglobin                                                                         |
| HPX            | hemopexin                                                                           |
| IGHA1          | immunoglobulin heavy constant alpha 1                                               |
| IGKC           | immunoglobulin kappa constant                                                       |
| ISG15          | ISG15 ubiquitin-like modifier                                                       |
| ITIH1          | inter-alpha (globulin) inhibitor H1                                                 |
| ITIH2          | inter-alpha (globulin) inhibitor H2                                                 |
| ITIH4          | inter-alpha (globulin) inhibitor H4 (plasma Kallikrein-sensitive glycoprotein)      |
| KNG1           | kininogen 1                                                                         |
| LGALS1         | lectin, galactoside-binding, soluble, 1                                             |
| LGALS3         | lectin, galactoside-binding, soluble, 3                                             |
| LYZ            | lysozyme                                                                            |
| NAMPT          | nicotinamide phosphoribosyltransferase                                              |
| NPC2           | Niemann-Pick disease, type C2                                                       |
| ORM1/ORM2      | orosomuroid 1                                                                       |
| PLG            | plasminogen                                                                         |
| PPBP           | pro-platelet basic protein (chemokine (C-X-C motif) ligand 7)                       |
| PSAP           | prosaposin                                                                          |
| SERPINA1       | serpin peptidase inhibitor, clade A (alpha-1 antiproteinase, antitrypsin), member 1 |
| SERPINA3       | serpin peptidase inhibitor, clade A (alpha-1 antiproteinase, antitrypsin), member 3 |
| SERPINC1       | serpin peptidase inhibitor, clade C (antithrombin), member 1                        |
| SERPIND1       | serpin peptidase inhibitor, clade D (heparin cofactor), member 1                    |
| SERPING1       | serpin peptidase inhibitor, clade G (C1 inhibitor), member 1                        |
| TF             | transferrin                                                                         |
| TYMP           | thymidine phosphorylase                                                             |

|        |                                                                                       |
|--------|---------------------------------------------------------------------------------------|
| VTN    | vitronectin                                                                           |
| WDR1   | WD repeat domain 1                                                                    |
| AHNAK  | AHNAK nucleoprotein                                                                   |
| AIF1   | allograft inflammatory factor 1                                                       |
| ANP32B | acidic (leucine-rich) nuclear phosphoprotein 32 family, member B                      |
| ANP32E | acidic (leucine-rich) nuclear phosphoprotein 32 family, member E                      |
| ANXA11 | annexin A11                                                                           |
| APEX1  | APEX nuclease (multifunctional DNA repair enzyme) 1                                   |
| BANF1  | barrier to autointegration factor 1                                                   |
| BAT1   | HLA-B associated transcript 1                                                         |
| CAPG   | capping protein (actin filament), gelsolin-like                                       |
| CELF2  | CUGBP, Elav-like family member 2                                                      |
| CFL1   | cofilin 1 (non-muscle)                                                                |
| CIRBP  | cold inducible RNA binding protein                                                    |
| CLIC1  | chloride intracellular channel 1                                                      |
| CMPK1  | cytidine monophosphate (UMP-CMP) kinase 1, cytosolic                                  |
| CREG1  | cellular repressor of E1A-stimulated genes 1                                          |
| CRYAA  | crystallin, alpha A                                                                   |
| CSE1L  | CSE1 chromosome segregation 1-like (yeast)                                            |
| DDX17  | DEAD (Asp-Glu-Ala-Asp) box polypeptide 17                                             |
| DDX39  | DEAD (Asp-Glu-Ala-Asp) box polypeptide 39                                             |
| DDX3X  | DEAD (Asp-Glu-Ala-Asp) box polypeptide 3, X-linked                                    |
| DDX5   | DEAD (Asp-Glu-Ala-Asp) box polypeptide 5                                              |
| DDX6   | DEAD (Asp-Glu-Ala-Asp) box polypeptide 6                                              |
| DHX15  | DEAH (Asp-Glu-Ala-His) box polypeptide 15                                             |
| DHX9   | DEAH (Asp-Glu-Ala-His) box polypeptide 9                                              |
| DNAJA1 | DnaJ (Hsp40) homolog, subfamily A, member 1                                           |
| EP300  | E1A binding protein p300                                                              |
| ERCC5  | excision repair cross-complementing rodent repair deficiency, complementation group 5 |
| ERH    | enhancer of rudimentary homolog (Drosophila)                                          |
| ESCO2  | establishment of cohesion 1 homolog 2 ( <i>S. cerevisiae</i> )                        |
| EWSR1  | Ewing sarcoma breakpoint region 1                                                     |
| FUBP1  | far upstream element (FUSE) binding protein 1                                         |
| FUS    | fused in sarcoma                                                                      |
| GFI1   | growth factor independent 1 transcription repressor                                   |
| H1FX   | H1 histone family, member X                                                           |
| H2AFV  | H2A histone family, member V                                                          |

|           |                                                                                          |
|-----------|------------------------------------------------------------------------------------------|
| H2AFX     | H2A histone family, member X                                                             |
| H2AFY     | H2A histone family, member Y                                                             |
| H2AFZ     | H2A histone family, member Z                                                             |
| HCLS1     | hematopoietic cell-specific Lyn substrate 1                                              |
| HINT1     | histidine triad nucleotide binding protein 1                                             |
| HIST1H1B  | histone cluster 1, H1b                                                                   |
| HIST1H1D  | histone cluster 1, H1d                                                                   |
| HIST1H2BB | histone cluster 1, H2bb                                                                  |
| HIST1H2BN | histone cluster 1, H2bn                                                                  |
| HMGB1     | high-mobility group box 1                                                                |
| HMGB2     | high-mobility group box 2                                                                |
| HNRNPA0   | heterogeneous nuclear ribonucleoprotein A0                                               |
| HNRNPA1   | heterogeneous nuclear ribonucleoprotein A1                                               |
| HNRNPA2B1 | heterogeneous nuclear ribonucleoprotein A2/B1                                            |
| HNRNPA3   | heterogeneous nuclear ribonucleoprotein A3                                               |
| HNRNPAB   | heterogeneous nuclear ribonucleoprotein A/B                                              |
| HNRNPC    | heterogeneous nuclear ribonucleoprotein C (C1/C2)                                        |
| HNRNPD    | heterogeneous nuclear ribonucleoprotein D (AU-rich element RNA binding protein 1, 37kDa) |
| HNRNPF    | heterogeneous nuclear ribonucleoprotein F                                                |
| HNRNPH1   | heterogeneous nuclear ribonucleoprotein H1 (H)                                           |
| HNRNPH3   | heterogeneous nuclear ribonucleoprotein H3 (2H9)                                         |
| HNRNPK    | heterogeneous nuclear ribonucleoprotein K                                                |
| HNRNPL    | heterogeneous nuclear ribonucleoprotein L                                                |
| HNRNPR    | heterogeneous nuclear ribonucleoprotein R                                                |
| HNRNPU    | heterogeneous nuclear ribonucleoprotein U (scaffold attachment factor A)                 |
| HNRNPUL1  | heterogeneous nuclear ribonucleoprotein U-like 1                                         |
| HNRPDL    | heterogeneous nuclear ribonucleoprotein D-like                                           |
| IFI16     | interferon, gamma-inducible protein 16                                                   |
| ILF2      | interleukin enhancer binding factor 2, 45kDa                                             |
| IPO5      | importin 5                                                                               |
| ISG20     | interferon stimulated exonuclease gene 20kDa                                             |
| KHDRBS1   | KH domain containing, RNA binding, signal transduction associated 1                      |
| KHSRP     | KH-type splicing regulatory protein                                                      |
| KPNB1     | karyopherin (importin) beta 1                                                            |
| LBR       | lamin B receptor                                                                         |
| LMNA      | lamin A/C                                                                                |
| LMNB1     | lamin B1                                                                                 |

|         |                                                                                          |
|---------|------------------------------------------------------------------------------------------|
| LRRFIP1 | leucine rich repeat (in FLII) interacting protein 1                                      |
| MATR3   | matrin 3                                                                                 |
| MCM3    | minichromosome maintenance complex component 3                                           |
| MDN1    | MDN1, midasin homolog (yeast)                                                            |
| MEF2D   | myocyte enhancer factor 2D                                                               |
| MNDA    | myeloid cell nuclear differentiation antigen                                             |
| MVP     | major vault protein                                                                      |
| MX1     | myxovirus (influenza virus) resistance 1, interferon-inducible protein p78 (mouse)       |
| NACA    | nascent polypeptide-associated complex alpha subunit                                     |
| NAP1L1  | nucleosome assembly protein 1-like 1                                                     |
| NAP1L4  | nucleosome assembly protein 1-like 4                                                     |
| NCL     | nucleolin                                                                                |
| NHP2L1  | NHP2 non-histone chromosome protein 2-like 1 ( <i>S. cerevisiae</i> )                    |
| NONO    | non-POU domain containing, octamer-binding                                               |
| NPM1    | nucleophosmin (nucleolar phosphoprotein B23, numatrin)                                   |
| NUB1    | negative regulator of ubiquitin-like proteins 1                                          |
| NUDT21  | nudix (nucleoside diphosphate linked moiety X)-type motif 21                             |
| OSTF1   | osteoclast stimulating factor 1                                                          |
| PA2G4   | proliferation-associated 2G4, 38kDa                                                      |
| PARK7   | Parkinson disease (autosomal recessive, early onset) 7                                   |
| PCBP1   | poly(rC) binding protein 1                                                               |
| PCBP2   | poly(rC) binding protein 2                                                               |
| PHB     | prohibitin                                                                               |
| PNP     | purine nucleoside phosphorylase                                                          |
| PPIG    | peptidylprolyl isomerase G (cyclophilin G)                                               |
| PRKDC   | protein kinase, DNA-activated, catalytic polypeptide                                     |
| PTBP1   | polypyrimidine tract binding protein 1                                                   |
| PTMA    | prothymosin, alpha                                                                       |
| RAI14   | retinoic acid induced 14                                                                 |
| RALY    | RNA binding protein, autoantigenic (hnRNP-associated with lethal yellow homolog (mouse)) |
| RBM3    | RNA binding motif (RNP1, RRM) protein 3                                                  |
| RBMX    | RNA binding motif protein, X-linked                                                      |
| RCC2    | regulator of chromosome condensation 2                                                   |
| RPL22   | ribosomal protein L22                                                                    |
| RPL27A  | ribosomal protein L27a                                                                   |
| RPS6KA2 | ribosomal protein S6 kinase, 90kDa, polypeptide 2                                        |
| RSF1    | remodeling and spacing factor 1                                                          |



|          |                                                                                                        |
|----------|--------------------------------------------------------------------------------------------------------|
| RUVBL2   | RuvB-like 2 (E. coli)                                                                                  |
| SAMHD1   | SAM domain and HD domain 1                                                                             |
| SERBP1   | SERPINE1 mRNA binding protein 1                                                                        |
| SET      | SET nuclear oncogene                                                                                   |
| SFPQ     | splicing factor proline/glutamine-rich                                                                 |
| SH3BGRL3 | SH3 domain binding glutamic acid-rich protein like 3                                                   |
| SMU1     | smu-1 suppressor of mec-8 and unc-52 homolog (C. elegans)                                              |
| SND1     | staphylococcal nuclease and tudor domain containing 1                                                  |
| SNRPD1   | small nuclear ribonucleoprotein D1 polypeptide 16kDa                                                   |
| SNRPD3   | small nuclear ribonucleoprotein D3 polypeptide 18kDa                                                   |
| SNRPE    | small nuclear ribonucleoprotein polypeptide E                                                          |
| SON      | SON DNA binding protein                                                                                |
| SRSF1    | serine/arginine-rich splicing factor 1                                                                 |
| SRSF3    | serine/arginine-rich splicing factor 3                                                                 |
| SRSF4    | serine/arginine-rich splicing factor 4                                                                 |
| SRSF7    | serine/arginine-rich splicing factor 7                                                                 |
| SSB      | Sjogren syndrome antigen B (autoantigen La)                                                            |
| STAT1    | signal transducer and activator of transcription 1, 91kDa                                              |
| SUB1     | SUB1 homolog (S. cerevisiae)                                                                           |
| SUMO3    | SMT3 suppressor of mif two 3 homolog 3 (S. cerevisiae)                                                 |
| SUN2     | Sad1 and UNC84 domain containing 2                                                                     |
| SYNCRIP  | synaptotagmin binding, cytoplasmic RNA interacting protein                                             |
| TAF15    | TAF15 RNA polymerase II, TATA box binding protein (TBP)-associated factor, 68kDa                       |
| TARDBP   | TAR DNA binding protein                                                                                |
| TCERG1   | transcription elongation regulator 1                                                                   |
| THOC4    | THO complex 4                                                                                          |
| TMPO     | thymopoietin                                                                                           |
| U2AF1    | U2 small nuclear RNA auxiliary factor 1                                                                |
| U2AF2    | U2 small nuclear RNA auxiliary factor 2                                                                |
| XRCC5    | X-ray repair complementing defective repair in Chinese hamster cells 5 (double-strand-break rejoining) |
| XRCC6    | X-ray repair complementing defective repair in Chinese hamster cells 6                                 |
| YBX1     | Y box binding protein 1                                                                                |
| ZNF621   | zinc finger protein 621                                                                                |
| ACTR2    | ARP2 actin-related protein 2 homolog (yeast)                                                           |
| ACTR3    | ARP3 actin-related protein 3 homolog (yeast)                                                           |
| AMOTL2   | angiominin like 2                                                                                      |
| ANTXR2   | anthrax toxin receptor 2                                                                               |

|               |                                                                                         |
|---------------|-----------------------------------------------------------------------------------------|
| ANXA1         | annexin A1                                                                              |
| ANXA2         | annexin A2                                                                              |
| ANXA5         | annexin A5                                                                              |
| ANXA6         | annexin A6                                                                              |
| ARL8B         | ADP-ribosylation factor-like 8B                                                         |
| AVPR1A        | arginine vasopressin receptor 1A                                                        |
| B2M           | beta-2-microglobulin                                                                    |
| BASP1         | brain abundant, membrane attached signal protein 1                                      |
| CAP1          | CAP, adenylate cyclase-associated protein 1 (yeast)                                     |
| CAP2          | CAP, adenylate cyclase-associated protein, 2 (yeast)                                    |
| CCR7          | chemokine (C-C motif) receptor 7                                                        |
| CD44          | CD44 molecule (Indian blood group)                                                      |
| CD63          | CD63 molecule                                                                           |
| CD74          | CD74 molecule, major histocompatibility complex, class II invariant chain               |
| CEACAM1 (incl | carcinoembryonic antigen-related cell adhesion molecule 1 (biliary glycoprotein)        |
| CLIC6         | chloride intracellular channel 6                                                        |
| CLTC          | clathrin, heavy chain (Hc)                                                              |
| CXADR         | coxsackie virus and adenovirus receptor                                                 |
| ENOX2         | ecto-NOX disulfide-thiol exchanger 2                                                    |
| EZR           | ezrin                                                                                   |
| GBP5          | guanylate binding protein 5                                                             |
| GNAI2         | guanine nucleotide binding protein (G protein), alpha inhibiting activity polypeptide 2 |
| GNB1          | guanine nucleotide binding protein (G protein), beta polypeptide 1                      |
| GNB4          | guanine nucleotide binding protein (G protein), beta polypeptide 4                      |
| GPER          | G protein-coupled estrogen receptor 1                                                   |
| HLA-B         | major histocompatibility complex, class I, B                                            |
| HLA-C         | major histocompatibility complex, class I, C                                            |
| HLA-DMA       | major histocompatibility complex, class II, DM alpha                                    |
| HLA-DPA1      | major histocompatibility complex, class II, DP alpha 1                                  |
| HLA-DPB1      | major histocompatibility complex, class II, DP beta 1                                   |
| HLA-DQA1      | major histocompatibility complex, class II, DQ alpha 1                                  |
| HLA-DQB1      | major histocompatibility complex, class II, DQ beta 1                                   |
| HLA-DRA       | major histocompatibility complex, class II, DR alpha                                    |
| HLA-F         | major histocompatibility complex, class I, F                                            |
| HNRNPM        | heterogeneous nuclear ribonucleoprotein M                                               |
| ICAM1         | intercellular adhesion molecule 1                                                       |
| IFITM3        | interferon induced transmembrane protein 3 (1-8U)                                       |

|          |                                                                    |
|----------|--------------------------------------------------------------------|
| IGHG2    | immunoglobulin heavy constant gamma 2 (G2m marker)                 |
| IGHM     | immunoglobulin heavy constant mu                                   |
| ITGB2    | integrin, beta 2 (complement component 3 receptor 3 and 4 subunit) |
| ITGB2    | integrin, beta 2 (complement component 3 receptor 3 and 4 subunit) |
| KRT6A    | keratin 6A                                                         |
| LAMP1    | lysosomal-associated membrane protein 1                            |
| LAMP2    | lysosomal-associated membrane protein 2                            |
| LGI1     | leucine-rich, glioma inactivated 1                                 |
| LMBR1L   | limb region 1 homolog (mouse)-like                                 |
| MARCKS   | myristoylated alanine-rich protein kinase C substrate              |
| MSN      | moesin                                                             |
| PTPRC    | protein tyrosine phosphatase, receptor type, C                     |
| RAPH1    | Ras association (RalGDS/AF-6) and pleckstrin homology domains 1    |
| SDCBP    | syndecan binding protein (syntenin)                                |
| STOM     | stomatin                                                           |
| TLN1     | talin 1                                                            |
| VASP     | vasodilator-stimulated phosphoprotein                              |
| VCL      | vinculin                                                           |
| ZC3HAV1  | zinc finger CCCH-type, antiviral 1                                 |
| ZYX      | zyxin                                                              |
| ARPC4    | actin related protein 2/3 complex, subunit 4, 20kDa                |
| C19orf52 | chromosome 19 open reading frame 52                                |
| C2orf58  | chromosome 2 open reading frame 58                                 |
| C6orf115 | chromosome 6 open reading frame 115                                |
| CPPED1   | calcineurin-like phosphoesterase domain containing 1               |
| CUTA     | cutA divalent cation tolerance homolog (E. coli)                   |
| CWF19L2  | CWF19-like 2, cell cycle control (S. pombe)                        |
| DCDC2    | doublecortin domain containing 2                                   |
| EFHD2    | EF-hand domain family, member D2                                   |
| EGFLAM   | EGF-like, fibronectin type III and laminin G domains               |
| EIF3M    | eukaryotic translation initiation factor 3, subunit M              |
| EML6     | echinoderm microtubule associated protein like 6                   |
| ESYT1    | extended synaptotagmin-like protein 1                              |
| FAM109A  | family with sequence similarity 109, member A                      |
| FAM49B   | family with sequence similarity 49, member B                       |
| FAM98A   | family with sequence similarity 98, member A                       |
| FAT4     | FAT tumor suppressor homolog 4 (Drosophila)                        |

|              |                                                                                                      |
|--------------|------------------------------------------------------------------------------------------------------|
| FLJ16779     | hypothetical LOC100192386                                                                            |
| HMCN2        | hemicentin 2                                                                                         |
| HMHA1        | histocompatibility (minor) HA-1                                                                      |
| IFIT2        | interferon-induced protein with tetratricopeptide repeats 2                                          |
| IGLV4-3      | immunoglobulin lambda variable 4-3                                                                   |
| KBTBD3       | kelch repeat and BTB (POZ) domain containing 3                                                       |
| KCTD12       | potassium channel tetramerisation domain containing 12                                               |
| KIF26B       | kinesin family member 26B                                                                            |
| LOC100133583 | HLA class II histocompatibility antigen, DQ beta 1 chain-like                                        |
| LOC344875    | collagen, type VI, alpha 4 pseudogene 1                                                              |
| LOC729081    | MARCKS-related protein-like                                                                          |
| MYL12A       | myosin, light chain 12A, regulatory, non-sarcomeric                                                  |
| NAF1         | nuclear assembly factor 1 homolog ( <i>S. cerevisiae</i> )                                           |
| NUP210L      | nucleoporin 210kDa-like                                                                              |
| PAICS        | phosphoribosylaminoimidazole carboxylase, phosphoribosylaminoimidazole succinocarboxamide synthetase |
| POTEE/POTEF  | POTE ankyrin domain family, member F                                                                 |
| STOX2        | storkhead box 2                                                                                      |
| TNNC2        | troponin C type 2 (fast)                                                                             |
| TTC37        | tetratricopeptide repeat domain 37                                                                   |
| TTLL3        | tubulin tyrosine ligase-like family, member 3                                                        |
| ULK4         | unc-51-like kinase 4 ( <i>C. elegans</i> )                                                           |
| YDJC         | YdjC homolog (bacterial)                                                                             |
| ZC3H12C      | zinc finger CCCH-type containing 12C                                                                 |
